# Supplementary material for: Sex-specific and pleiotropic effects underlying kidney function identified from GWAS meta-analysis
Source: PubMed Central journal article supplement (PMC6478837; doi:10.1038/s41467-019-09861-z), 2019-04-23
Supplement: 41467_2019_9861_MOESM1_ESM.pdf [file 41467_2019_9861_MOESM1_ESM.pdf]

**Supplementary Information:**

Graham et al. "Sex-specific and pleiotropic effects underlying kidney function identified from GWAS meta-analysis"

### Supplementary Figure 1:

#### Meta-Analysis: Estimated Glomerular Filtration Rate

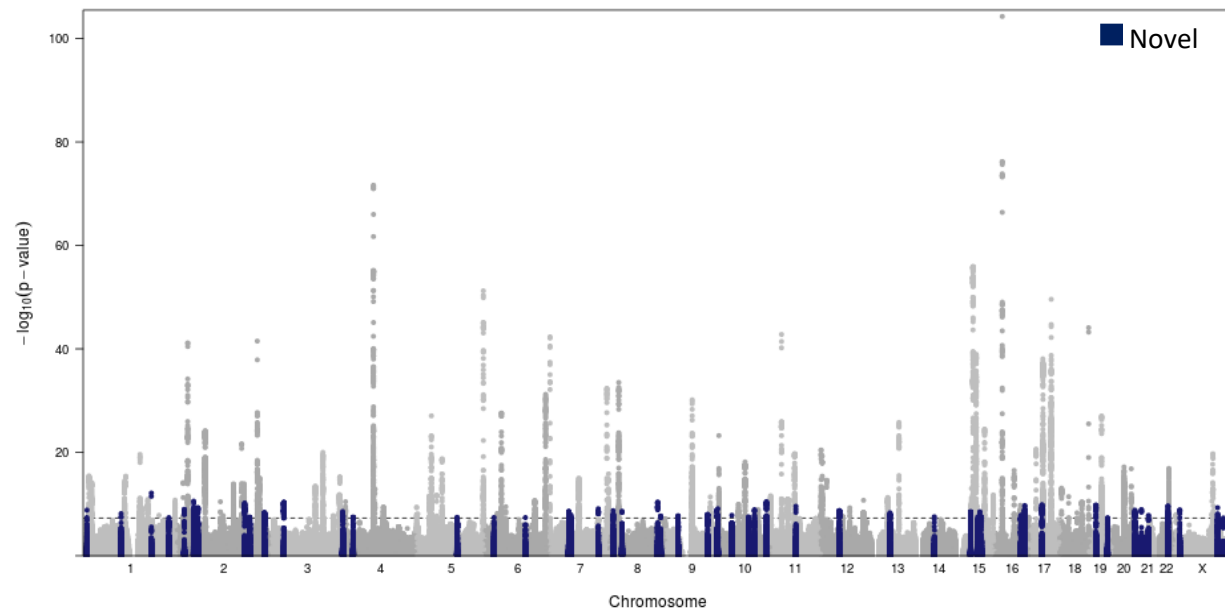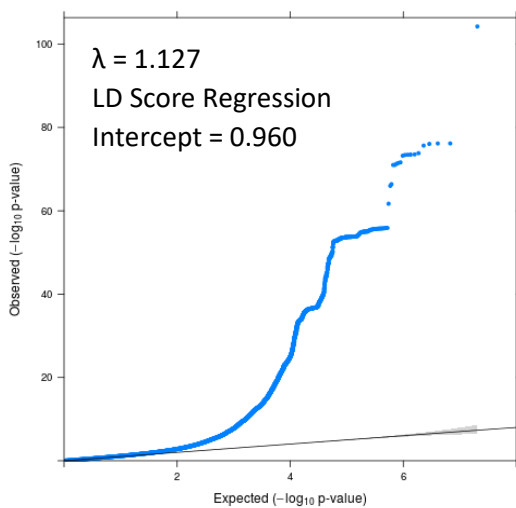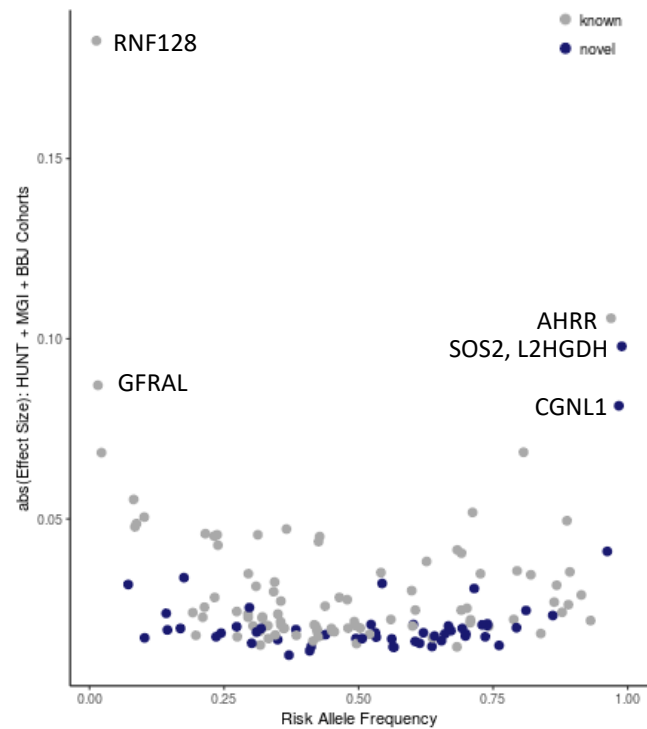

Manhattan and QQ Plot (MAF > 0.5%) from meta-analysis of eGFR. The effect sizes (from meta-analysis of HUNT, MGI, and BBJ cohorts due to differing units of CKDGen consortium) are plotted against the risk allele frequencies for the index variants from the overall meta-analysis. Prioritized genes are labeled for variants with the largest effect sizes.

## Supplementary Figure 2

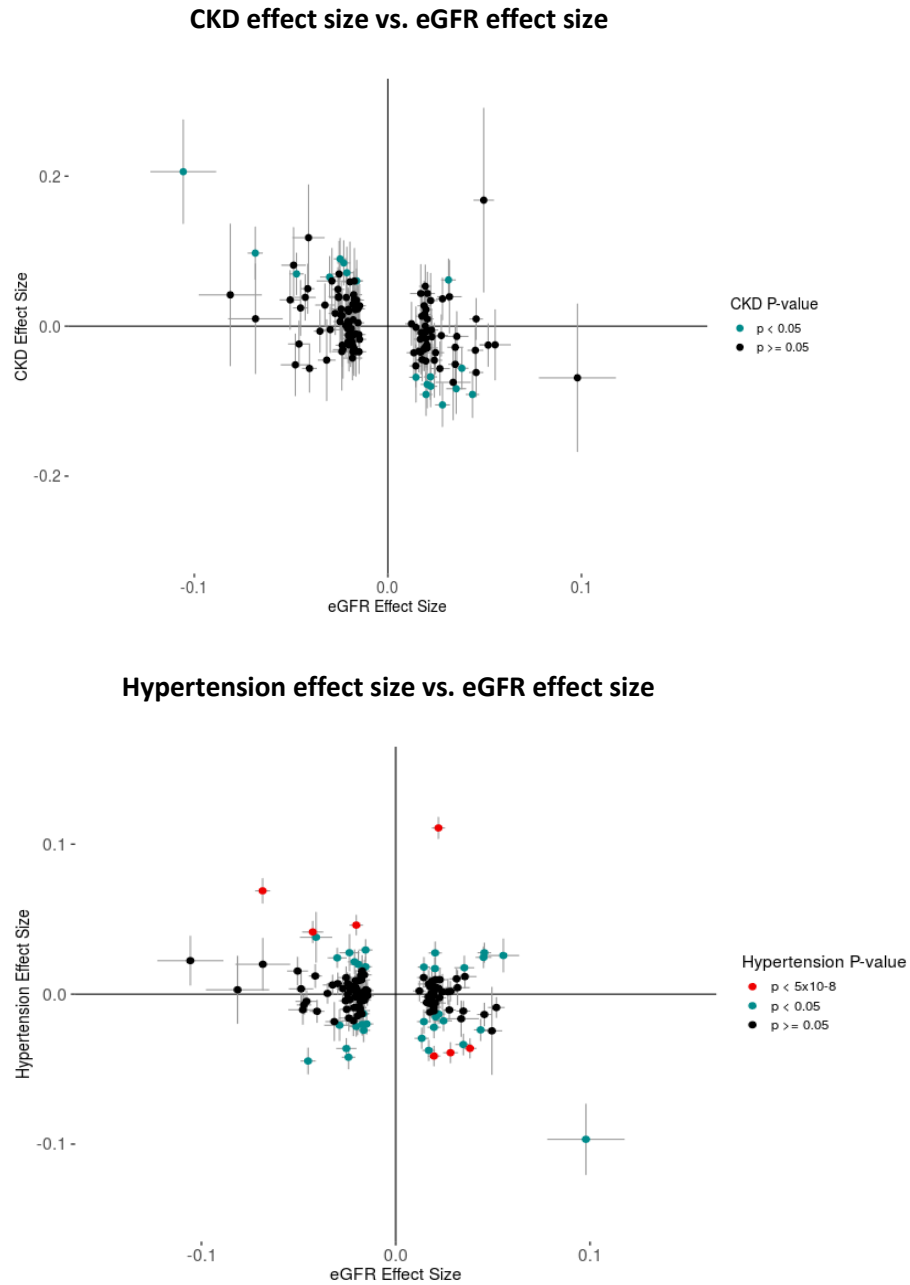

Comparison of eGFR and CKD or hypertension effect sizes for eGFR index variants. The plots are colored according to the significance of the variants for either CKD or hypertension. Error bars represent  $\pm 1$  SE.

**Supplementary Figure 3**

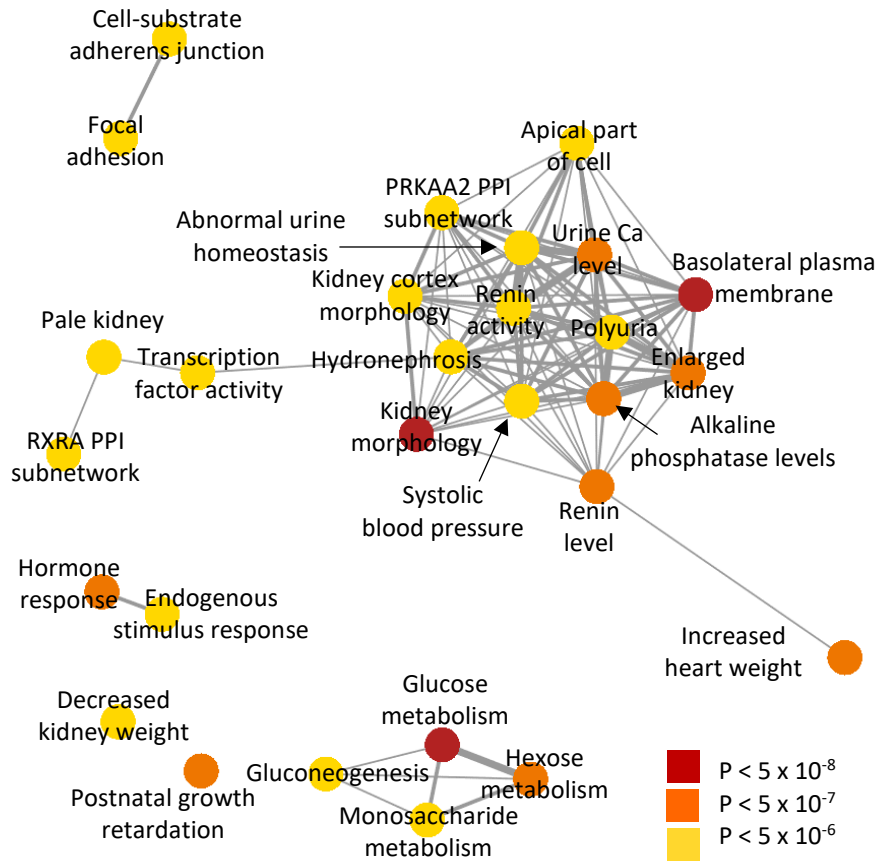

DEPICT network graph prior to collapsing overlapping gene sets. Overlap between gene sets is depicted by the width of connecting lines.

### Supplementary Figure 4

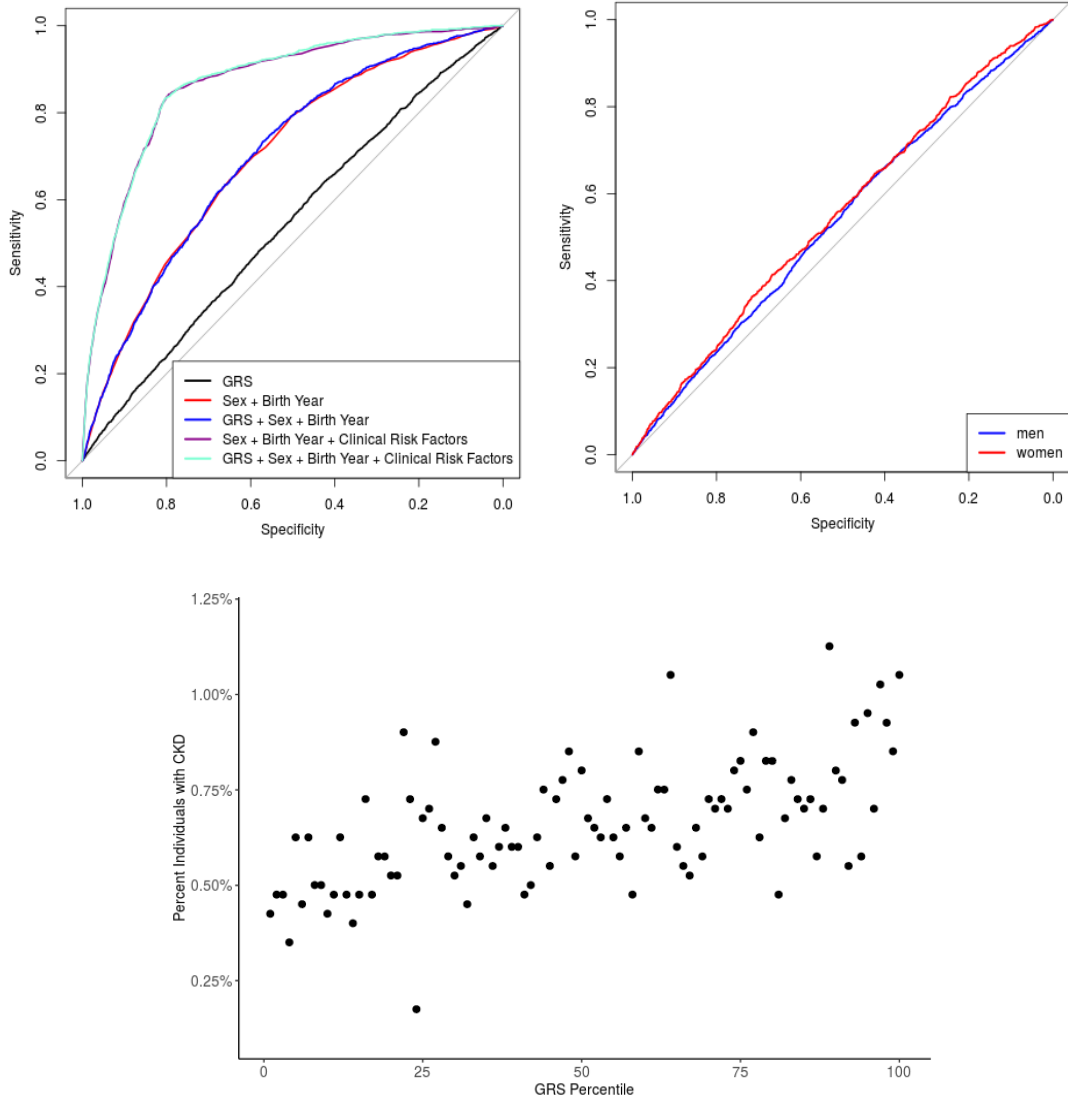

ROC plots for eGFR genetic risk scores as predictors of CKD in the white British subset of UK Biobank. Plots are shown for the best-performing genetic risk score taken from clumping of the eGFR meta-analysis results using the European subset of 1000 Genomes and all independent markers ( $r^2 < 0.4$ ) with  $p$ -value  $< 5 \times 10^{-6}$ . CKD prevalence in the highest GRS percentile (1.05%) was 2.5 times higher than that of the lowest GRS percentile (0.43%) and 1.6 times higher than CKD prevalence among all other percentiles (0.65%).

## Supplementary Figure 5

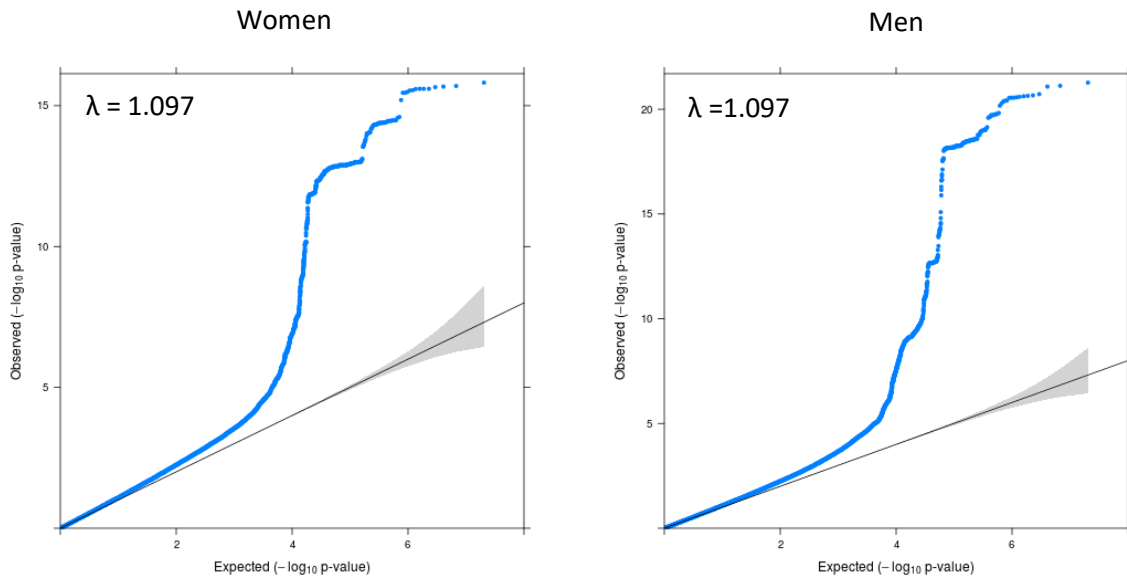

QQ Plots from sex-specific analysis for variants with MAF > 0.5%

Supplementary Figure 6

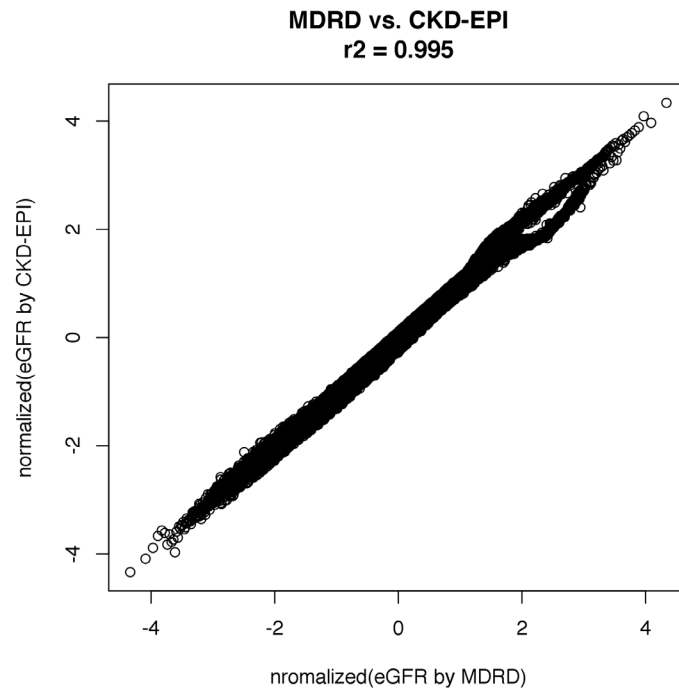

Comparison of eGFR phenotype values calculated with MDRD and CKD-EPI equations after adjustment for covariates

Supplementary Figure 7

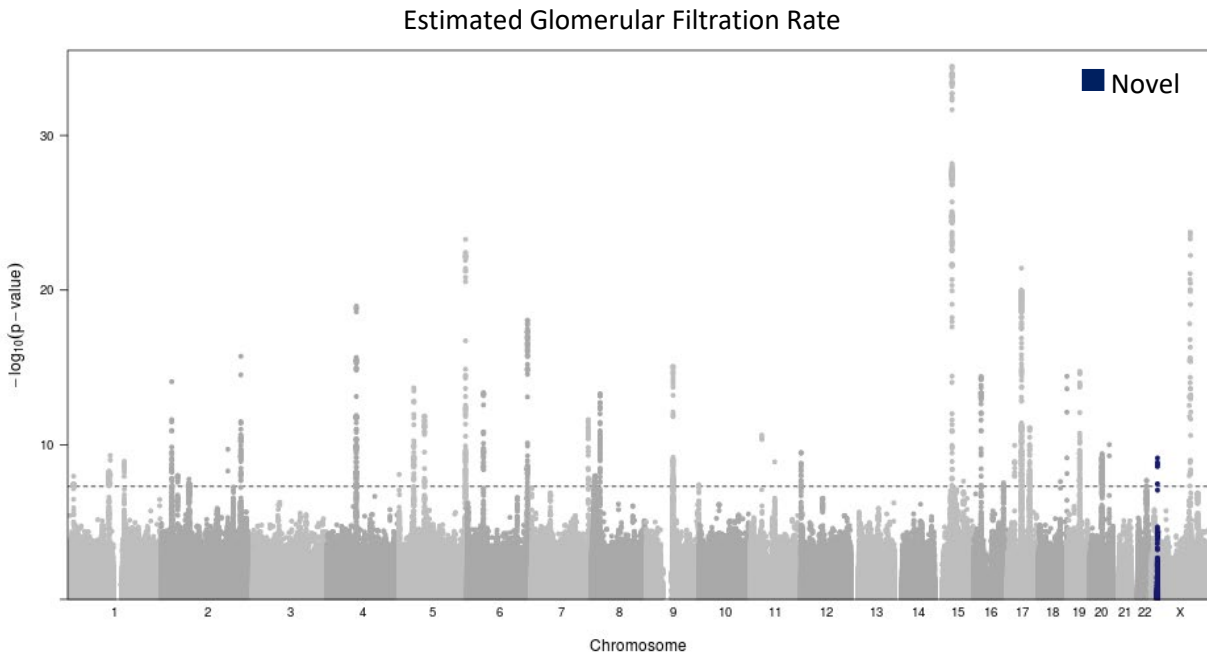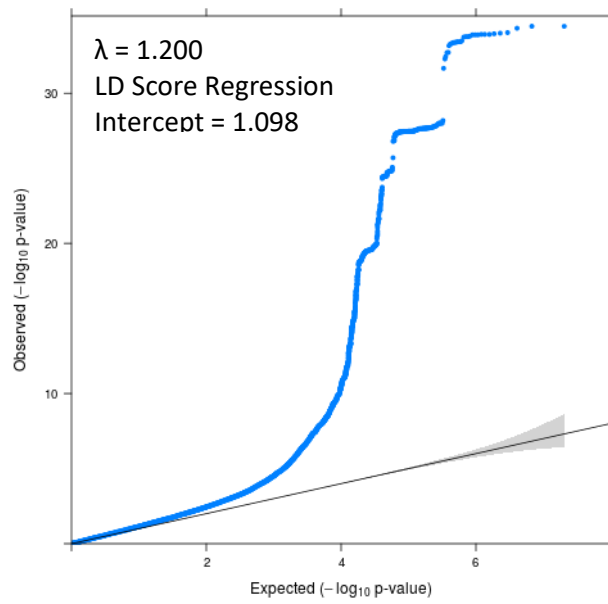

Manhattan and QQ Plot (MAF > 0.5%) from HUNT analysis of eGFR



## Supplementary Figure 8

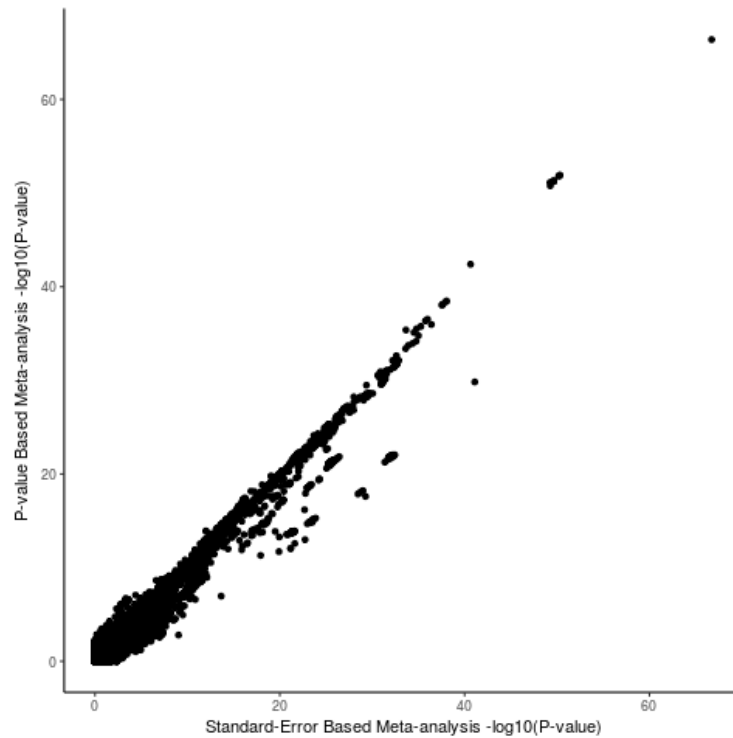

Meta-analysis of the HUNT, BBJ, and MGI cohorts was performed using both p-value and standard-error-based approaches. The overall correlation in p-values for individual variants between methods was extremely high (Pearson  $r = 0.966$ ). P-values obtained using the standard-error-based approach trended towards increased significance for a subset of variants. This is likely due to higher variability in allele frequencies than average for these variants between European (HUNT and MGI) and East Asian (BBJ) ancestries. Variants reaching genome-wide significance were very similar between methods.

## Supplementary Figure 9

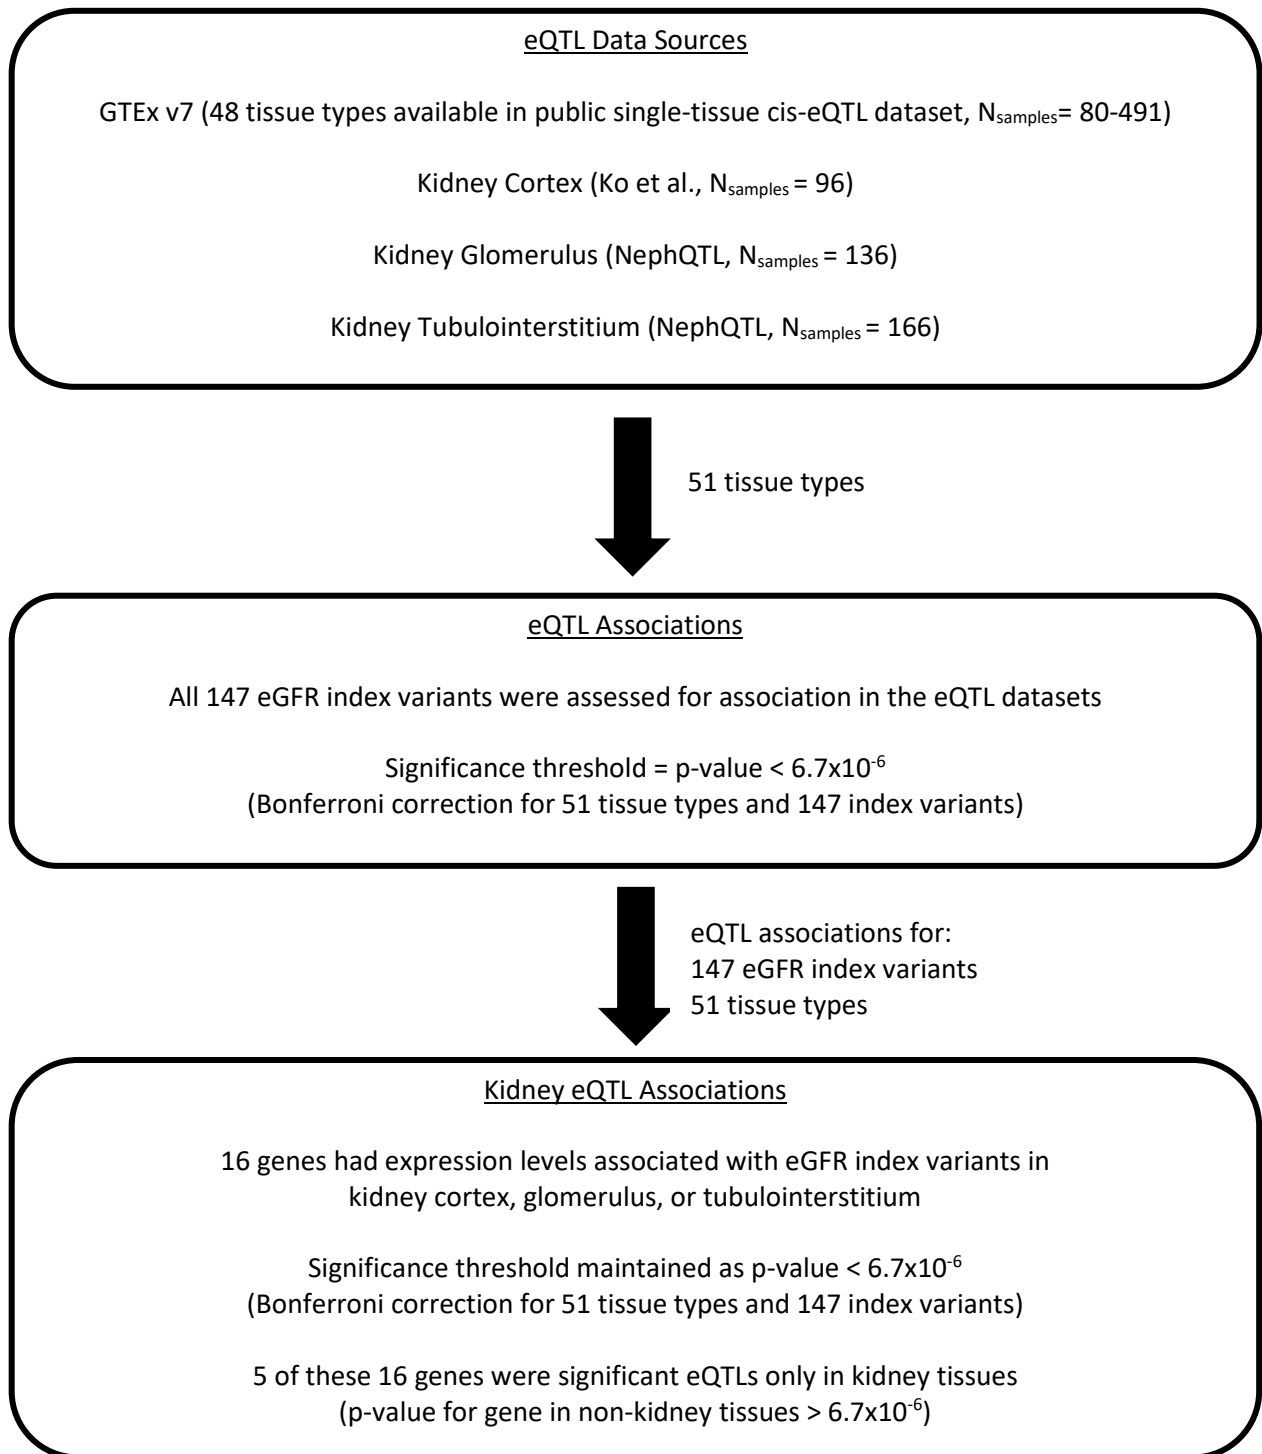

eQTL datasets from GTEx V7, NephQTL, and Ko et al. were used to identify eGFR index variants which may be acting through the regulation of gene expression. The following flowchart summarizes the included samples and datasets. Complete listings of tissue types, data sources, and sample sizes are given in **Supplementary Table 2**.

Supplementary Table 1: Significant missense variants from meta-analysis of eGFR

| Chr | Pos (hg19) | Ref | Alt | rsID       | Freq   | FreqSE | Weight | Zscore  | pvalue   | Direction | Gene    | Protein Variants | r <sup>2</sup> with lead |
|-----|------------|-----|-----|------------|--------|--------|--------|---------|----------|-----------|---------|------------------|--------------------------|
| 1   | 15808767   | A   | G   | rs3820071  | 0.6    | 0.1153 | 347323 | 5.995   | 2.03E-09 | ++++      | CELA2B  | p.Gly79Arg       | 0.6142                   |
| 1   | 15808872   | A   | G   | rs3766160  | 0.612  | 0.1111 | 347323 | 5.622   | 1.88E-08 | ++++      | CELA2B  | p.Asp114Asn      | 0.6365                   |
| 1   | 113255456  | A   | C   | rs34611728 | 0.9163 | 0.0324 | 206846 | 8.054   | 8.01E-16 | ++?+      | PPM1J   | p.Leu213Phe      | 0.9828                   |
| 1   | 150737220  | A   | G   | rs41271951 | 0.0586 | 0.0236 | 206846 | 6.662   | 2.71E-11 | ++?+      | CTSS    | p.Val7Ala        | 0.2995                   |
| 1   | 150940625  | T   | G   | rs267738   | 0.1075 | 0.0674 | 347323 | 9.238   | 2.52E-20 | ++++      | CERS2   | p.Glu115Val      | lead variant             |
| 1   | 150958836  | A   | G   | rs267733   | 0.0856 | 0.0448 | 347322 | 6.105   | 1.03E-09 | ++++      | ANXA9   | p.Asp166Gly      | 0.5489                   |
| 1   | 150974971  | A   | T   | rs41310885 | 0.9351 | 0.0046 | 206846 | -6.365  | 1.96E-10 | --?-      | FAM63A  | p.Arg41Ser       | 0.2561                   |
| 1   | 151015868  | A   | G   | rs12068365 | 0.9309 | 0.0053 | 203665 | -5.818  | 5.94E-09 | --?-      | BNIP1   | p.Ser226Asn      | 0.2337                   |
| 1   | 151062957  | A   | G   | rs11204774 | 0.9351 | 0.0068 | 203662 | -5.922  | 3.18E-09 | --?-      | GABPB2  | p.Val62Ile       | 0.2337                   |
| 1   | 155178782  | A   | T   | rs760077   | 0.7098 | 0.1262 | 350504 | 6.173   | 6.69E-10 | ++++      | MTX1    | p.Ser63Thr       | 0.9725                   |
| 1   | 171509327  | A   | G   | rs760644   | 0.1958 | 0.1854 | 350504 | -6.325  | 2.54E-10 | ----      | PRRC2C  | p.Ala906Thr      | 0.7490                   |
| 1   | 171514731  | C   | G   | rs235468   | 0.8066 | 0.1854 | 350504 | 6.319   | 2.63E-10 | ++++      | PRRC2C  | p.Ser1624Cys     | 0.7492                   |
| 1   | 201016296  | A   | G   | rs3850625  | 0.931  | 0.0343 | 347322 | -5.66   | 1.52E-08 | ----      | CACNA1S | p.Arg1539Cys     | lead variant             |
| 1   | 243493907  | A   | T   | rs2275155  | 0.2286 | 0.0541 | 350504 | -6.159  | 7.30E-10 | ----      | SDCCAG8 | p.Glu378Asp      | 0.5011                   |
| 2   | 27730940   | T   | C   | rs1260326  | 0.5403 | 0.1034 | 347318 | -13.546 | 8.34E-42 | ----      | GCKR    | p.Leu446Pro      | 0.9097                   |
| 2   | 27801493   | T   | C   | rs1919127  | 0.4139 | 0.1456 | 347319 | 10.012  | 1.36E-23 | ++++      | C2orf16 | p.Val685Ala      | 0.4367                   |
| 2   | 27801759   | A   | G   | rs1919128  | 0.405  | 0.1492 | 350504 | 10.042  | 1.00E-23 | ++++      | C2orf16 | p.Ile774Val      | 0.4367                   |
| 2   | 27851918   | A   | G   | rs3749147  | 0.7104 | 0.0759 | 350504 | -8.422  | 3.69E-17 | ----      | GPN1    | p.Arg12Lys       | 0.2890                   |
| 2   | 54587596   | T   | C   | rs2280718  | 0.2865 | 0.152  | 347320 | -5.913  | 3.35E-09 | ----      | C2orf73 | p.Pro254Leu      | 0.9636                   |
| 2   | 73651967   | T   | C   | rs3813227  | 0.8279 | 0.1394 | 347322 | -7.346  | 2.05E-13 | --+       | ALMS1   | p.Arg393Cys      | 0.8587                   |
| 2   | 73677898   | C   | G   | rs6546837  | 0.8265 | 0.1395 | 350504 | -7.413  | 1.24E-13 | --+       | ALMS1   | p.Gly1416Ala     | 0.8587                   |
| 2   | 73679280   | A   | G   | rs6546838  | 0.1711 | 0.1381 | 347323 | 7.287   | 3.16E-13 | +++       | ALMS1   | p.Ile1877Val     | 0.8546                   |
| 2   | 73679866   | T   | C   | rs10496192 | 0.1262 | 0.025  | 206846 | 8.561   | 1.12E-17 | ++?+      | ALMS1   | p.Ile2072Thr     | 0.6323                   |
| 2   | 73679990   | A   | T   | rs6724782  | 0.8266 | 0.1394 | 350504 | -7.383  | 1.54E-13 | --+       | ALMS1   | p.Ser2113Arg     | 0.8546                   |
| 2   | 73680508   | C   | G   | rs6546839  | 0.8266 | 0.1394 | 350504 | -7.384  | 1.54E-13 | --+       | ALMS1   | p.Arg2286Pro     | 0.8546                   |
| 2   | 73717567   | T   | G   | rs2056486  | 0.8293 | 0.1379 | 347322 | -7.332  | 2.28E-13 | --+       | ALMS1   | p.Arg2828Ser     | 0.8587                   |
| 2   | 73717656   | A   | G   | rs10193972 | 0.1709 | 0.1379 | 347731 | 7.336   | 2.20E-13 | +++       | ALMS1   | p.Asn2858Ser     | 0.8587                   |
| 2   | 73828538   | A   | G   | rs1052161  | 0.3688 | 0.0952 | 347322 | 8.837   | 9.85E-19 | ++++      | ALMS1   | p.Arg4031Lys     | 0.2868                   |
| 2   | 73868328   | A   | G   | rs13538    | 0.2315 | 0.0215 | 206846 | 10.176  | 2.55E-24 | ++?+      | NAT8    | p.Phe143Ser      | 0.9845                   |

|    |           |   |   |            |        |        |        |         |          |      |          |              |              |
|----|-----------|---|---|------------|--------|--------|--------|---------|----------|------|----------|--------------|--------------|
| 2  | 74007136  | T | C | rs2272051  | 0.6287 | 0.0861 | 347322 | -7.168  | 7.63E-13 | ---- | DUSP11   | p.Asp36Gly   | 0.1699       |
| 2  | 148716428 | T | C | rs2307394  | 0.3991 | 0.0796 | 347320 | -7.184  | 6.77E-13 | ---- | ORC4     | p.Asn78Thr   | 0.8890       |
| 2  | 211540507 | A | C | rs1047891  | 0.7685 | 0.0682 | 350504 | 13.619  | 3.11E-42 | ++++ | CPS1     | p.Thr1412Asn | lead variant |
| 3  | 121643804 | T | C | rs2257212  | 0.4184 | 0.1226 | 347323 | 7.485   | 7.13E-14 | ++++ | SLC15A2  | p.Leu350Phe  | 1            |
| 3  | 121647286 | T | C | rs1143671  | 0.4184 | 0.1226 | 347323 | 7.499   | 6.42E-14 | ++++ | SLC15A2  | p.Pro409Ser  | 1            |
| 3  | 121648168 | A | G | rs1143672  | 0.419  | 0.1224 | 349675 | 7.349   | 2.00E-13 | ++++ | SLC15A2  | p.Arg509Lys  | 1            |
| 3  | 185331165 | A | C | rs6762208  | 0.6357 | 0.022  | 350504 | 6.846   | 7.57E-12 | ++++ | SENP2    | p.Thr301Lys  | 0.9954       |
| 3  | 186445052 | T | G | rs2304456  | 0.1202 | 0.0226 | 349263 | -5.825  | 5.70E-09 | ---- | KNG1     | p.Ile197Met  | 0.2989       |
| 4  | 77192868  | A | G | rs3733250  | 0.6145 | 0.0284 | 347322 | 8.713   | 2.97E-18 | ++++ | FAM47E   | p.Glu273Lys  | 0.1991       |
| 5  | 39364554  | A | G | rs700233   | 0.7412 | 0.1097 | 347318 | 8.415   | 3.93E-17 | ++++ | C9       | p.Arg5Trp    | 0.3496       |
| 6  | 31237862  | T | C | rs9264621  | 0.1118 | 0.0215 | 301059 | 5.453   | 4.97E-08 | ++++ | HLA-C    | p.Glu299Gly  | 1            |
| 6  | 133789728 | A | G | rs9493627  | 0.647  | 0.0289 | 347320 | -5.839  | 5.24E-09 | ---- | EYA4     | p.Gly277Ser  | 0.1963       |
| 6  | 160670282 | A | C | rs316019   | 0.8244 | 0.2091 | 347322 | -10.636 | 2.03E-26 | ---- | SLC22A2  | p.Ser270Ala  | 0.0153       |
| 7  | 77552127  | A | G | rs848486   | 0.3438 | 0.1064 | 350504 | -7.96   | 1.73E-15 | ---- | PHTF2    | p.Arg350His  | 1            |
| 9  | 34107505  | T | C | rs11557154 | 0.6536 | 0.184  | 350501 | -5.57   | 2.54E-08 | ---- | DCAF12   | p.Arg131Gln  | 0.9936       |
| 10 | 1065710   | T | C | rs1044261  | 0.9506 | 0.0114 | 203665 | 7.45    | 9.31E-14 | ++?+ | IDI2     | p.Trp144Ter  | 0.2526       |
| 10 | 69926334  | C | G | rs10823148 | 0.3677 | 0.097  | 350504 | 7.843   | 4.41E-15 | ++++ | MYPN     | p.Phe628Leu  | 0.7903       |
| 10 | 69933921  | A | G | rs10997975 | 0.5956 | 0.0615 | 347323 | -7.669  | 1.74E-14 | ---- | MYPN     | p.Ser691Asn  | 0.7801       |
| 10 | 69933969  | A | G | rs7916821  | 0.6316 | 0.0853 | 347323 | -8.657  | 4.83E-18 | ---- | MYPN     | p.Ser707Asn  | 0.8747       |
| 10 | 69959242  | A | C | rs7079481  | 0.6178 | 0.078  | 347322 | -8.682  | 3.88E-18 | ---- | MYPN     | p.Pro1135Thr | 0.9518       |
| 10 | 104573017 | T | G | rs284859   | 0.7854 | 0.0487 | 347322 | -5.824  | 5.74E-09 | ---- | WBP1L    | p.Ala341Ser  | 0.9927       |
| 11 | 47701528  | A | C | rs12286721 | 0.3586 | 0.0849 | 347318 | -5.934  | 2.96E-09 | ---- | AGBL2    | p.Met67Ile   | 0.4533       |
| 11 | 47857253  | T | C | rs3816605  | 0.3334 | 0.068  | 347320 | -5.993  | 2.05E-09 | ---- | NUP160   | p.Thr351Ala  | 0.4572       |
| 11 | 65143892  | A | G | rs34400381 | 0.974  | 0.0086 | 204493 | -6.251  | 4.08E-10 | --?- | SLC25A45 | p.Arg285Cys  | 0.0001       |
| 11 | 65386206  | C | G | rs1193851  | 0.224  | 0.0993 | 350503 | 5.613   | 1.99E-08 | ++++ | PCNX3    | p.Ser458Cys  | 0.0908       |
| 12 | 48723324  | C | G | rs2732441  | 0.2445 | 0.0932 | 206844 | -5.94   | 2.84E-09 | --?- | H1FNT    | p.Arg84Gly   | 0.9790       |
| 12 | 48736985  | T | G | rs2732481  | 0.2444 | 0.0946 | 203655 | -6.014  | 1.82E-09 | --?- | ZNF641   | p.Gln363Pro  | lead variant |
| 12 | 112375990 | A | C | rs3752630  | 0.182  | 0.0285 | 347727 | 5.597   | 2.18E-08 | ++++ | TMEM116  | p.Cys114Gly  | 0.2929       |
| 15 | 45545478  | T | C | rs11854484 | 0.7297 | 0.2067 | 350504 | -12.178 | 4.09E-34 | ---- | SLC28A2  | p.Pro22Leu   | 0.7265       |
| 15 | 45554267  | A | C | rs1060896  | 0.7217 | 0.2185 | 347322 | -12.109 | 9.50E-34 | ---- | SLC28A2  | p.Ser75Arg   | 0.7899       |
| 15 | 45661678  | A | T | rs1288775  | 0.3777 | 0.2338 | 350504 | 15.523  | 2.41E-54 | ++++ | GATM     | p.Gln110His  | 0.6419       |

|    |           |   |   |             |        |        |        |         |          |      |          |              |              |
|----|-----------|---|---|-------------|--------|--------|--------|---------|----------|------|----------|--------------|--------------|
| 15 | 45695382  | A | G | rs7182723   | 0.4219 | 0.2475 | 350504 | 15.455  | 7.02E-54 | ++++ | SPATA5L1 | p.Arg252Gln  | 0.6205       |
| 15 | 53907948  | A | G | rs17730281  | 0.6832 | 0.0663 | 350504 | -13.182 | 1.12E-39 | ---- | WDR72    | p.Leu819Phe  | lead variant |
| 15 | 54003091  | A | G | rs551225    | 0.6445 | 0.0729 | 349248 | 9.663   | 4.31E-22 | ++++ | WDR72    | p.Pro306Leu  | 0.2218       |
| 16 | 20410547  | T | C | rs9926580   | 0.7506 | 0.0488 | 345095 | -10.211 | 1.77E-24 | ---- | PDILT    | p.Ala26Thr   | 0.2304       |
| 17 | 19474875  | T | C | rs111653425 | 0.9849 | 0.0031 | 96329  | 6.8     | 1.04E-11 | ?+?+ | SLC47A1  | p.Ala465Val  | 0.0077       |
| 17 | 34854280  | A | G | rs2306590   | 0.6239 | 0.0551 | 347315 | -5.78   | 7.45E-09 | ---- | MYO19    | p.Leu663Phe  | 0.8846       |
| 17 | 37814080  | A | G | rs1877031   | 0.4725 | 0.0847 | 347321 | 7.379   | 1.60E-13 | ++++ | STARD3   | p.Arg117Gln  | 0.2812       |
| 17 | 37879588  | A | G | rs1136201   | 0.1768 | 0.0568 | 342042 | -7.303  | 2.82E-13 | ---- | ERBB2    | p.Ile655Val  | 0.0368       |
| 17 | 37884037  | C | G | rs1058808   | 0.5249 | 0.0913 | 350502 | -5.927  | 3.09E-09 | ---- | ERBB2    | p.Pro1170Ala | 0.2158       |
| 17 | 37944519  | C | G | rs112301322 | 0.0281 | 0.0126 | 205584 | -5.539  | 3.04E-08 | --?- | IKZF3    | p.Gly234Ala  | 0.0054       |
| 17 | 59489893  | T | C | rs9907379   | 0.6805 | 0.1406 | 350502 | 11.923  | 9.03E-33 | ++++ | C17orf82 | p.Leu186Pro  | 0.1368       |
| 19 | 33281924  | A | G | rs11881633  | 0.7031 | 0.1596 | 347320 | 6.757   | 1.41E-11 | ++++ | TDRD12   | p.Lys413Glu  | 0.1569       |
| 19 | 33293607  | T | C | rs11673502  | 0.9016 | 0.0328 | 350504 | -6.859  | 6.95E-12 | ---- | TDRD12   | p.Thr748Met  | 0.1180       |
| 19 | 33301074  | A | G | rs144485154 | 0.0174 | 0.0103 | 195378 | 5.568   | 2.58E-08 | ++?+ | TDRD12   | p.Thr915Ala  | 0.0092       |
| 19 | 33309030  | A | T | rs12151363  | 0.0975 | 0.0335 | 350504 | 6.894   | 5.41E-12 | ++++ | TDRD12   | p.Gln1122Leu | 0.1200       |
| 19 | 33414420  | A | G | rs4805825   | 0.3782 | 0.1563 | 347323 | 5.892   | 3.81E-09 | ++++ | CEP89    | p.Val398Ala  | 0.4238       |
| 20 | 33587198  | C | G | rs3746435   | 0.8428 | 0.0177 | 350502 | 5.56    | 2.71E-08 | ++++ | MYH7B    | p.Lys1552Asn | 0.3063       |
| 20 | 62340115  | C | G | rs1291212   | 0.8324 | 0.2939 | 204319 | 5.978   | 2.25E-09 | ++?+ | ZGPAT    | p.Ser61Arg   | 0.9772       |
| 20 | 62369997  | T | C | rs1151625   | 0.9432 | 0.0168 | 201550 | 5.519   | 3.41E-08 | ++?+ | LIME1    | p.Pro211Leu  | 0.9659       |
| X  | 106016268 | A | T | rs56121637  | 0.0127 | 0.0038 | 96329  | -9.266  | 1.94E-20 | ?-?- | RNF128   | p.Asn204Tyr  | lead variant |
| X  | 106221389 | T | C | rs41304048  | 0.0268 | 0.0052 | 96329  | -7.374  | 1.66E-13 | ?-?- | MORC4    | p.Asn326Ser  | 0.0241       |

Supplementary Table 2: eQTL data sources with sample size

| Tissue Type                           | Data Source | Sample Size |
|---------------------------------------|-------------|-------------|
| Adipose_Subcutaneous                  | GTEEx v7    | 385         |
| Adipose_Visceral_Omentum              | GTEEx v7    | 313         |
| Adrenal_Gland                         | GTEEx v7    | 175         |
| Artery_Aorta                          | GTEEx v7    | 267         |
| Artery_Coronary                       | GTEEx v7    | 152         |
| Artery_Tibial                         | GTEEx v7    | 388         |
| Brain_Amygdala                        | GTEEx v7    | 88          |
| Brain_Anterior_cingulate_cortex_BA24  | GTEEx v7    | 109         |
| Brain_Caudate_basal_ganglia           | GTEEx v7    | 144         |
| Brain_Cerebellar_Hemisphere           | GTEEx v7    | 125         |
| Brain_Cerebellum                      | GTEEx v7    | 154         |
| Brain_Cortex                          | GTEEx v7    | 136         |
| Brain_Frontal_Cortex_BA9              | GTEEx v7    | 118         |
| Brain_Hippocampus                     | GTEEx v7    | 111         |
| Brain_Hypothalamus                    | GTEEx v7    | 108         |
| Brain_Nucleus_accumbens_basal_ganglia | GTEEx v7    | 130         |
| Brain_Putamen_basal_ganglia           | GTEEx v7    | 111         |
| Brain_Spinal_cord_cervical_c-1        | GTEEx v7    | 83          |
| Brain_Substantia_nigra                | GTEEx v7    | 80          |
| Breast_Mammary_Tissue                 | GTEEx v7    | 251         |
| Cells_EBV-transformed_lymphocytes     | GTEEx v7    | 117         |
| Cells_Transformed_fibroblasts         | GTEEx v7    | 300         |
| Colon_Sigmoid                         | GTEEx v7    | 203         |
| Colon_Transverse                      | GTEEx v7    | 246         |
| Esophagus_Gastroesophageal_Junction   | GTEEx v7    | 213         |
| Esophagus_Mucosa                      | GTEEx v7    | 358         |
| Esophagus_Muscularis                  | GTEEx v7    | 335         |
| Heart_Atrial_Appendage                | GTEEx v7    | 264         |
| Heart_Left_Ventricle                  | GTEEx v7    | 272         |
| Liver                                 | GTEEx v7    | 153         |
| Lung                                  | GTEEx v7    | 383         |
| Minor_Salivary_Gland                  | GTEEx v7    | 85          |
| Muscle_Skeletal                       | GTEEx v7    | 491         |
| Nerve_Tibial                          | GTEEx v7    | 361         |
| Ovary                                 | GTEEx v7    | 122         |
| Pancreas                              | GTEEx v7    | 220         |
| Pituitary                             | GTEEx v7    | 157         |
| Prostate                              | GTEEx v7    | 132         |
| Skin_Not_Sun_Exposed_Suprapubic       | GTEEx v7    | 335         |
| Skin_Sun_Exposed_Lower_leg            | GTEEx v7    | 414         |
| Small_Intestine_Terminal_Ileum        | GTEEx v7    | 122         |

|                        |                                                                                                                                                                 |                                                                                             |
|------------------------|-----------------------------------------------------------------------------------------------------------------------------------------------------------------|---------------------------------------------------------------------------------------------|
| Spleen                 | GTEx v7                                                                                                                                                         | 146                                                                                         |
| Stomach                | GTEx v7                                                                                                                                                         | 237                                                                                         |
| Testis                 | GTEx v7                                                                                                                                                         | 225                                                                                         |
| Thyroid                | GTEx v7                                                                                                                                                         | 399                                                                                         |
| Uterus                 | GTEx v7                                                                                                                                                         | 101                                                                                         |
| Vagina                 | GTEx v7                                                                                                                                                         | 106                                                                                         |
| Whole_Blood            | GTEx v7                                                                                                                                                         | 369                                                                                         |
| Kidney_Cortex          | Ko et al. 2017                                                                                                                                                  | 96                                                                                          |
| Glomerulus             | NephQTL                                                                                                                                                         | 136                                                                                         |
| Tubulointerstitium     | NephQTL                                                                                                                                                         | 166                                                                                         |
|                        |                                                                                                                                                                 |                                                                                             |
| Dataset file locations |                                                                                                                                                                 |                                                                                             |
| GTEx v7                | <a href="https://gtexportal.org/home/datasets">https://gtexportal.org/home/datasets</a>                                                                         | GTEx_Analysis_v7_eQTL.tar.gz                                                                |
| NephQTL                | <a href="https://umich.app.box.com/s/6jrvgmdh0ppwqvgriuviji au0xcb4ohm">https://umich.app.box.com/s/6jrvgmdh0ppwqvgriuviji au0xcb4ohm</a>                       | peerEQTL_G.2017-09-25.reformat.bgzip.cis.gz,<br>peerEQTL_T.2017-09-25.reformat.bgzip.cis.gz |
| Ko et al. 2017         | <a href="https://ars.els-cdn.com/content/image/1-s2.0-S000292971730191X-mmc4.xlsx">https://ars.els-cdn.com/content/image/1-s2.0-S000292971730191X-mmc4.xlsx</a> |                                                                                             |

Supplementary Table 3a: Significant missense variants from eGFR analysis in HUNT

| Chr | Pos (hg19) | Ref | Alt | rsID        | Freq     | Beta     | SE       | P-value (GC) | Gene     | Protein Variant | r <sup>2</sup> with lead |
|-----|------------|-----|-----|-------------|----------|----------|----------|--------------|----------|-----------------|--------------------------|
| 1   | 113255456  | C   | A   | rs34611728  | 0.112406 | -0.05373 | 0.008792 | 2.42E-08     | PPM1J    | p.Leu213Phe     | 0.9763                   |
| 1   | 150940625  | T   | G   | rs267738    | 0.209508 | 0.040973 | 0.00685  | 4.74E-08     | CERS2    | p.Glu115Ala     | 0.5462                   |
| 2   | 27730940   | T   | C   | rs1260326   | 0.676098 | -0.04158 | 0.005934 | 1.59E-10     | GCKR     | p.Leu446Pro     | 0.5303                   |
| 2   | 211540507  | C   | A   | rs1047891   | 0.304447 | -0.05076 | 0.006169 | 5.88E-14     | CPS1     | p.Thr1412Asn    | lead variant             |
| 4   | 77192868   | G   | A   | rs3733250   | 0.426614 | -0.03639 | 0.005655 | 4.23E-09     | FAM47E   | p.Glu273Lys     | 0.2527                   |
| 5   | 39364554   | G   | A   | rs700233    | 0.391922 | -0.03444 | 0.005743 | 4.38E-08     | C9       | p.Arg5Trp       | 0.7857                   |
| 11  | 65143892   | G   | A   | rs34400381  | 0.036074 | 0.090692 | 0.014957 | 3.11E-08     | SLC25A45 | p.Arg285Cys     | lead variant             |
| 15  | 45545478   | C   | T   | rs11854484  | 0.593482 | 0.057955 | 0.005704 | 1.78E-20     | SLC28A2  | p.Pro22Leu      | 0.7144                   |
| 15  | 45554267   | C   | A   | rs1060896   | 0.62986  | 0.06017  | 0.005801 | 2.83E-21     | SLC28A2  | p.Ser75Arg      | 0.8120                   |
| 15  | 45661678   | T   | A   | rs1288775   | 0.299525 | -0.06749 | 0.006113 | 6.85E-24     | GATM     | p.Gln110His     | 0.6286                   |
| 15  | 45695382   | G   | A   | rs7182723   | 0.298607 | -0.06735 | 0.006131 | 1.14E-23     | SPATA5L1 | p.Arg252Gln     | 0.6257                   |
| 17  | 19474875   | C   | T   | rs111653425 | 0.017013 | -0.13982 | 0.021654 | 3.76E-09     | SLC47A1  | p.Ala465Val     | lead variant             |
| 17  | 37814080   | G   | A   | rs1877031   | 0.670095 | -0.04025 | 0.005953 | 6.76E-10     | STARD3   | p.Arg117Gln     | 0.4534                   |
| 17  | 37879588   | A   | G   | rs1136201   | 0.276071 | -0.04082 | 0.006248 | 2.47E-09     | ERBB2    | p.Ile655Val     | 0.0926                   |
| X   | 106016268  | A   | T   | rs56121637  | 0.015023 | -0.19326 | 0.018933 | 1.18E-20     | RNF128   | p.Asn204Tyr     | lead variant             |
| X   | 106221389  | T   | C   | rs41304048  | 0.030001 | -0.10082 | 0.013522 | 1.00E-11     | MORC4    | p.Asn326Ser     | 0.4901                   |

Supplementary Table 3b: Stop-gain variants identified from creatinine analysis in HUNT

| Chr | Pos (hg19) | Ref | Alt | rsID        | Freq     | Beta     | SE       | P-value  | Gene | Protein Variant | r <sup>2</sup> with lead |
|-----|------------|-----|-----|-------------|----------|----------|----------|----------|------|-----------------|--------------------------|
| 4   | 88996055   | C   | T   | rs755226061 | 0.000267 | 1.045884 | 0.178346 | 4.51E-09 | PKD2 | p.Arg872Ter     | 0                        |



Supplementary Table 4: Significant variants from conditional analysis for eGFR in HUNT

| Chr | Pos (hg19) | Ref | Alt | rsID       | Freq     | Beta     | SE       | Conditional P-value | Variants Conditioned on | Original P-value | eQTL    | Nearest Gene                  |
|-----|------------|-----|-----|------------|----------|----------|----------|---------------------|-------------------------|------------------|---------|-------------------------------|
| 6   | 160575985  | C   | T   | rs2297374  | 0.349894 | -0.03521 | 0.005818 | 1.40E-09            | 6:160668186_CCT/C       | 1.10E-09         | SLC22A1 | SLC22A1                       |
| 11  | 30754837   | G   | A   | rs55733296 | 0.040983 | -0.10866 | 0.01512  | 6.60E-13            | 11:30760335_T/C         | 8.20E-08         | NA      | LOC101928316,<br>LOC101928338 |
| 17  | 59043487   | T   | G   | rs72843596 | 0.153791 | 0.047923 | 0.007913 | 1.40E-09            | 17:59476066_A/C         | 1.10E-10         | NA      | BCAS3                         |
