# Supplementary material for: Sex-specific and pleiotropic effects underlying kidney function identified from GWAS meta-analysis
Source: PubMed Central journal article supplement (PMC6478837; doi:10.1038/s41467-019-09861-z), 2019-04-23
Supplement: 41467_2019_9861_MOESM3_ESM.pdf [file 41467_2019_9861_MOESM3_ESM.pdf]

## Description of Additional Supplementary Files

Supplementary data 1: Meta-analysis results for eGFR

Supplementary data 2: Gene prioritization strategy at genome-wide significant loci for eGFR

Supplementary data 3: Colocalization results of eQTL and eGFR

Supplementary data 4: DEPICT gene prioritization results

Supplementary data 5: eGFR meta-analysis results with lookup of association results for related kidney, diabetic, and cardiovascular traits in UK Biobank

Supplementary data 6: Previously reported index variants with p-value from meta-analysis with previously published datasets excluded (HUNT + MGI)

Supplementary data 7: Significant eQTL associations for index variants

Supplementary data 8: DEPICT tissue enrichment

Supplementary data 9: DEPICT gene set enrichment

Supplementary data 10: Details of kidney, cardiovascular, and other traits within UK Biobank assessed for overlap with eGFR loci

Supplementary data 11: eGFR index variants from overall meta-analysis with association results stratified by sex within HUNT

Supplementary data 12: Significant loci from HUNT association results
